# Supplementary material
Source: MDPI journal article supplement (https://www.mdpi.com/2073-4344/13/4/671)
Supplement: s1 [file s1]

# 3D Flower-like $\text{TiO}_2$ Nanostructures: Anatase-To-Rutile Phase Transformation and Photoelectrochemical Application

Anna Kusior <sup>1,\*</sup>, Piotr Jeleń <sup>1</sup>, Maciej Sitarz <sup>1</sup>, Konrad Świerczek <sup>2</sup> and Marta Radecka <sup>1</sup>

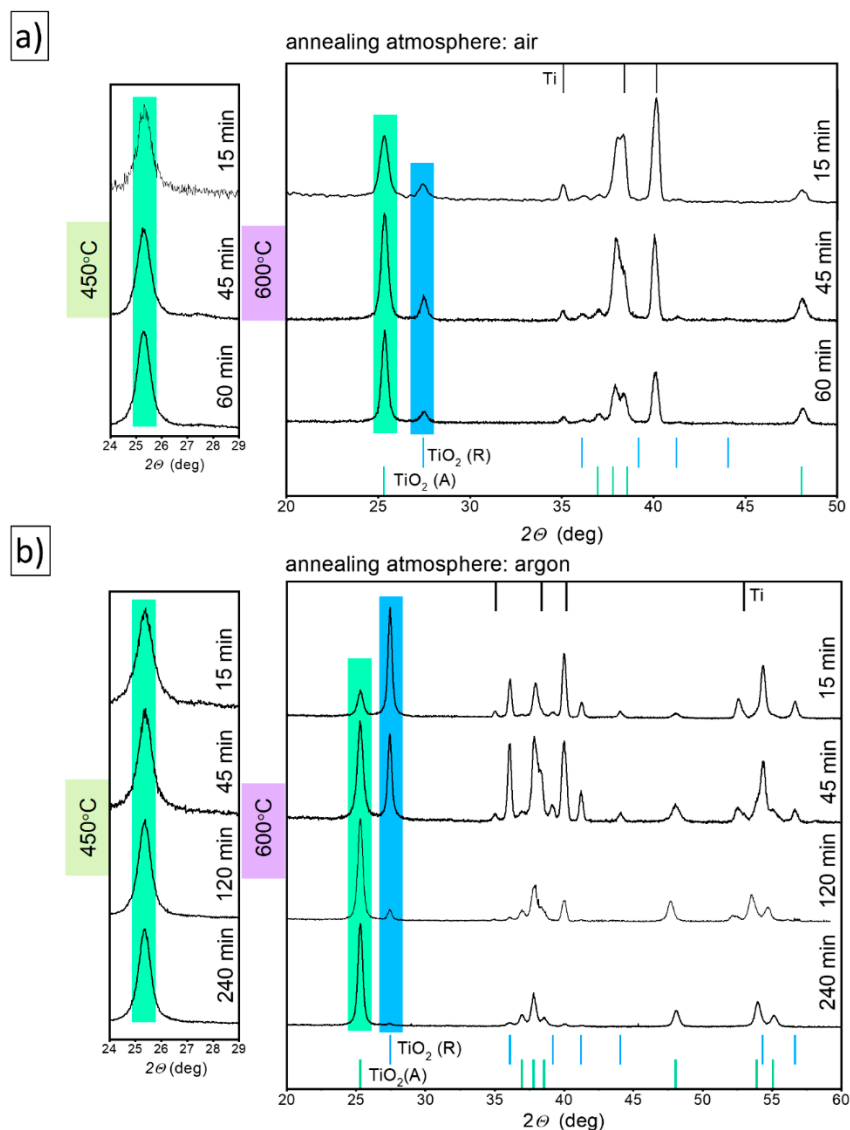

**Figure S1.** XRD data of nanostructures obtained at various reaction times and temperature annealed in (a) air and (b) argon atmosphere.

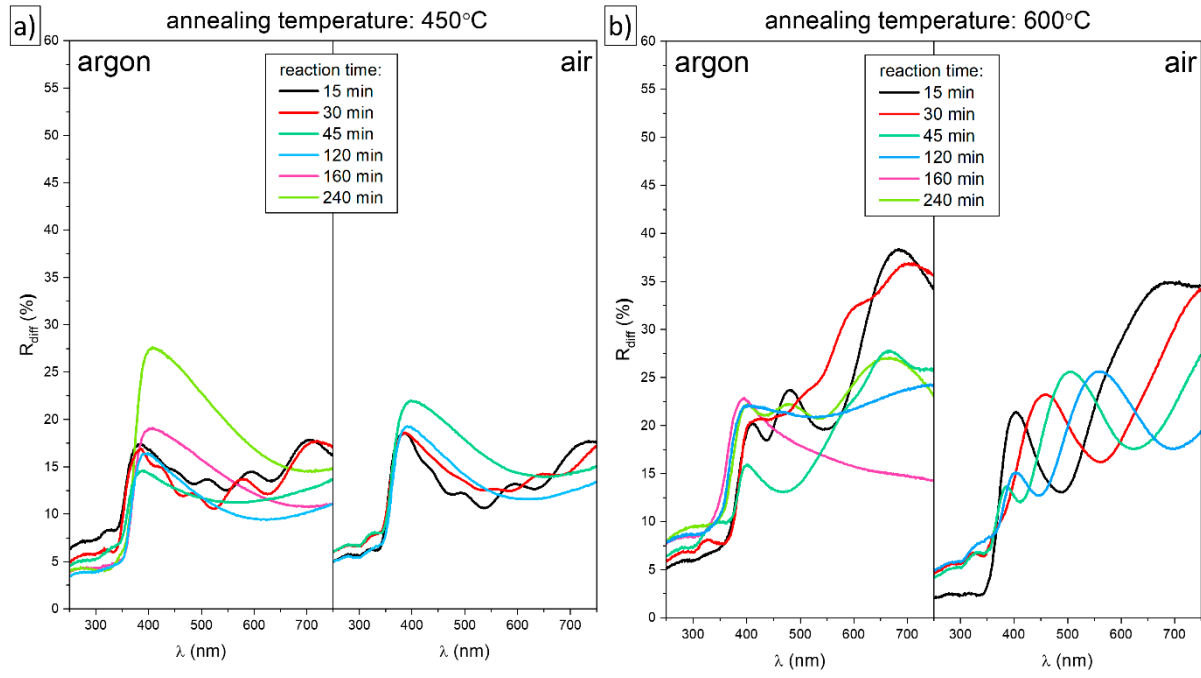

**Figure S2.** Reflectance spectra  $R_{diff}$  for 3D flower-like nanostructures after annealing in argon and the air at (a) 450 and (b) 600°C.

**Table S1.** Optical bandgap values for flower-like 3D nanostructures annealed at various conditions

| atmosphere | reaction time (min) | Optical bandgap value, $E_{opt}$ ( $\pm 0.05$ eV) |      |                       |      |              |      |
|------------|---------------------|---------------------------------------------------|------|-----------------------|------|--------------|------|
|            |                     | $\frac{dR_{diff}}{d\lambda}$                      |      | $(KMh\nu)^{1/\gamma}$ |      |              |      |
|            |                     | 450                                               | 600  | $\gamma = 1/2$        |      | $\gamma = 2$ |      |
|            |                     |                                                   |      | 450                   | 600  | 450          | 600  |
| argon      | 15                  | 3.48                                              | 3.24 | 3.25                  | 3.10 | 3.36         | 3.48 |
|            | 30                  | 3.44                                              | 3.21 | 3.36                  | 3.11 | 3.40         | 3.62 |
|            | 45                  | 3.46                                              | 3.23 | 3.33                  | 3.14 | 3.32         | 3.53 |
|            | 60                  | 3.46                                              | 3.35 | 3.21                  | 2.64 | 3.32         | 3.25 |
|            | 120                 | 3.40                                              | 3.37 | 3.31                  | 3.25 | 3.36         | 3.33 |
|            | 160                 | 3.40                                              | 3.42 | 3.33                  | 3.27 | 3.36         | 3.36 |
|            | 240                 | 3.32                                              | 3.32 | 3.24                  | 3.19 | 3.32         | 3.26 |
| air        | 15                  | 3.40                                              | 3.24 | 3.37                  | 3.23 | 3.29         | 3.31 |
|            | 30                  | 3.38                                              | 3.29 | 3.24                  | 3.29 | 3.29         | 3.34 |
|            | 45                  | 3.35                                              | 3.29 | 3.26                  | 3.20 | 3.29         | 3.44 |
|            | 60                  | 3.35                                              | 3.17 | 3.20                  | 3.10 | 3.32         | 3.45 |
